# Supplementary material for: Recycling and the end of life assessment of fluoropolymers: recent developments, challenges and future trends
Source: Royal Society of Chemistry journal article supplement (doi:10.1039/d2cs00763k), 2023-01-01
Supplement: d2cs00763k1.pdf [file d2cs00763k1.pdf]

## Supporting Information

### Recycling and End of life assessment of Fluoropolymers: Recent Developments, Challenges and Future Trends

Bruno Améduri\*,<sup>1</sup> Hisao Hori,<sup>2</sup>

<sup>1</sup> ICGM, University of Montpellier, CNRS, ENSCM, 34095 Montpellier, France.

EMAIL address: [bruno.ameduri@enscm.fr](mailto:bruno.ameduri@enscm.fr)

<sup>2</sup> Kanagawa University,

Faculty of Science, 2946 Tsuchiya, Hiratsuka 259-1293, Japan

EMAIL address: [h-hori@kanagawa-u.ac.jp](mailto:h-hori@kanagawa-u.ac.jp)

#### Companies developing recycling of PTFE-products

##### Fluorothermoplastics, FTP:

- Aturon GmbH, Parkweg 3, CH 9443 Widnau, Switzerland, Tel.: +41 (0)71 351 47 61, [www.aturon.ch](http://www.aturon.ch)

- Heroflon S.p.A., Via de Gasperi 4, I 25060 Collebeato, Italy, Tel: +39 030 2510211, [www-heroflon.com](http://www-heroflon.com)

- MINGER Kunststofftechnik AG, Industriestrasse 19, CH-9050 Appenzell, Switzerland, Tel.: +41 71 788 01 20, [www.minger.ch](http://www.minger.ch)

- Trifluor Kunststoff GmbH, Am Langenhorster Bahnhof 18, 48607 Ochtrup, Germany Tel: +49(0)2553 93640, [www.trifluor.de](http://www.trifluor.de)

##### PTFE:

- Heroflon S.p.A., Via de Gasperi 4, I 25060 Collebeato, Italy, Tel: +39 030 2510211, [www-heroflon.com](http://www-heroflon.com)

- Shamrock Technologies BVBA, Heersterveldeweg 21, B-3700 Tongeren, Belgium, Tel.: +32 (0)12 45 83 30, [www.shamrocktechnologies.com](http://www.shamrocktechnologies.com)

- Mikro-Technik GmbH & Co.KG, Industriestrasse 4, D-63927 Bürgstadt, Germany, Tel.: +49 (0)9371 4005-43, Fax.: +45 (0)9371 4005-70, [www.mikro-technik.com](http://www.mikro-technik.com)

- MINGER Kunststofftechnik AG, Industriestrasse 19, CH-9050 Appenzell, Switzerland, Tel.: +41 71 788 01 20, [www.minger.ch](http://www.minger.ch)

- United Polymer Mixers, Ramgatseweg 14, NL-4941 VS Raamsdonksveer, The Netherlands, Tel.:+31 (0)1625 14 945, [www.upmkunststoffen.nl](http://www.upmkunststoffen.nl)

Companies operating Up-Cycling of PTFE and selected PTFE-compounds and Perfluorinated Fluorothermoplastics

- Dyneon GmbH, Bau 172, Industrieparkstrasse 1, D-84508 Burgkirchen, Germany; [www.3M.com](http://www.3M.com); Marc Lenczyk, Tel.: +49 8679 76417

Companies operating recycling PVDF (for polymer processing and recycling aid (PPRA))

- Arkema, Colombes, 420 rue d'Estienne d'Orves 92700 Colombes, France; Tel. +33- 01 49 00 80 80
